# Supplementary material
Source: PubMed Central journal article supplement (PMC3742542)
Supplement: NIHMS492644-supplement-Suppl_1-3.pdf [file NIHMS492644-supplement-Suppl_1-3.pdf]

## **Fernene Triterpenoids from the lichen *Pyxine berteriana***

Marta S. Maier<sup>\*,†</sup>, María L. Rosso<sup>†,‡</sup>, Alejandra T. Fazio<sup>†,‡</sup>, Mónica T. Adler<sup>‡</sup> and María D. Bertoni<sup>‡</sup>

UMYMFOR (CONICET - UBA) and Departamento de Química Orgánica, Facultad de Ciencias Exactas y Naturales, PROPLAME-PRHIDEB-Departamento de Biodiversidad y Biología Experimental, Facultad de Ciencias Exactas y Naturales, Pabellón 2, Ciudad Universitaria, 1428 Buenos Aires, Argentina.

### **Supporting Information Available**

\* Corresponding author. Tel and /Fax: +54 11 4576-3385. E-mail: [maier@go.fcen.uba.ar](mailto:maier@go.fcen.uba.ar).

<sup>†</sup> UMYMFOR (CONICET – UBA) and Departamento de Química Orgánica

<sup>‡</sup> PROPLAME-PRHIDEB-Departamento de Biodiversidad y Biología Experimental

**List of supporting information:**

- S1:  $^1\text{H}$  NMR spectrum of the new compound **1** in  $\text{CDCl}_3$
- S2:  $^{13}\text{C}$  NMR spectrum of the new compound **1** in  $\text{CDCl}_3$
- S3:  $^{13}\text{C}$  NMR spectrum of the new compound **1** in  $\text{CDCl}_3$  (partial view of the region 48.0 – 15.6 ppm)
- S4: HMBC spectrum of the new compound **1** in  $\text{CDCl}_3$
- S5: NOESY spectrum of the new compound **1** in  $\text{CDCl}_3$
- S6: HREIMS spectrum of the new compound **1**
- S7:  $^1\text{H}$  NMR spectrum of the new compound **2** in  $\text{CDCl}_3$
- S8:  $^{13}\text{C}$  NMR spectrum of the new compound **2** in  $\text{CDCl}_3$
- S9:  $^{13}\text{C}$  NMR spectrum of the new compound **2** in  $\text{CDCl}_3$  (partial view of the region 44.4 – 15.6 ppm)
- S10: HMBC spectrum of the new compound **2** in  $\text{CDCl}_3$
- S11: NOESY spectrum of the new compound **2** in  $\text{CDCl}_3$
- S12: HREIMS spectrum of the new compound **2**

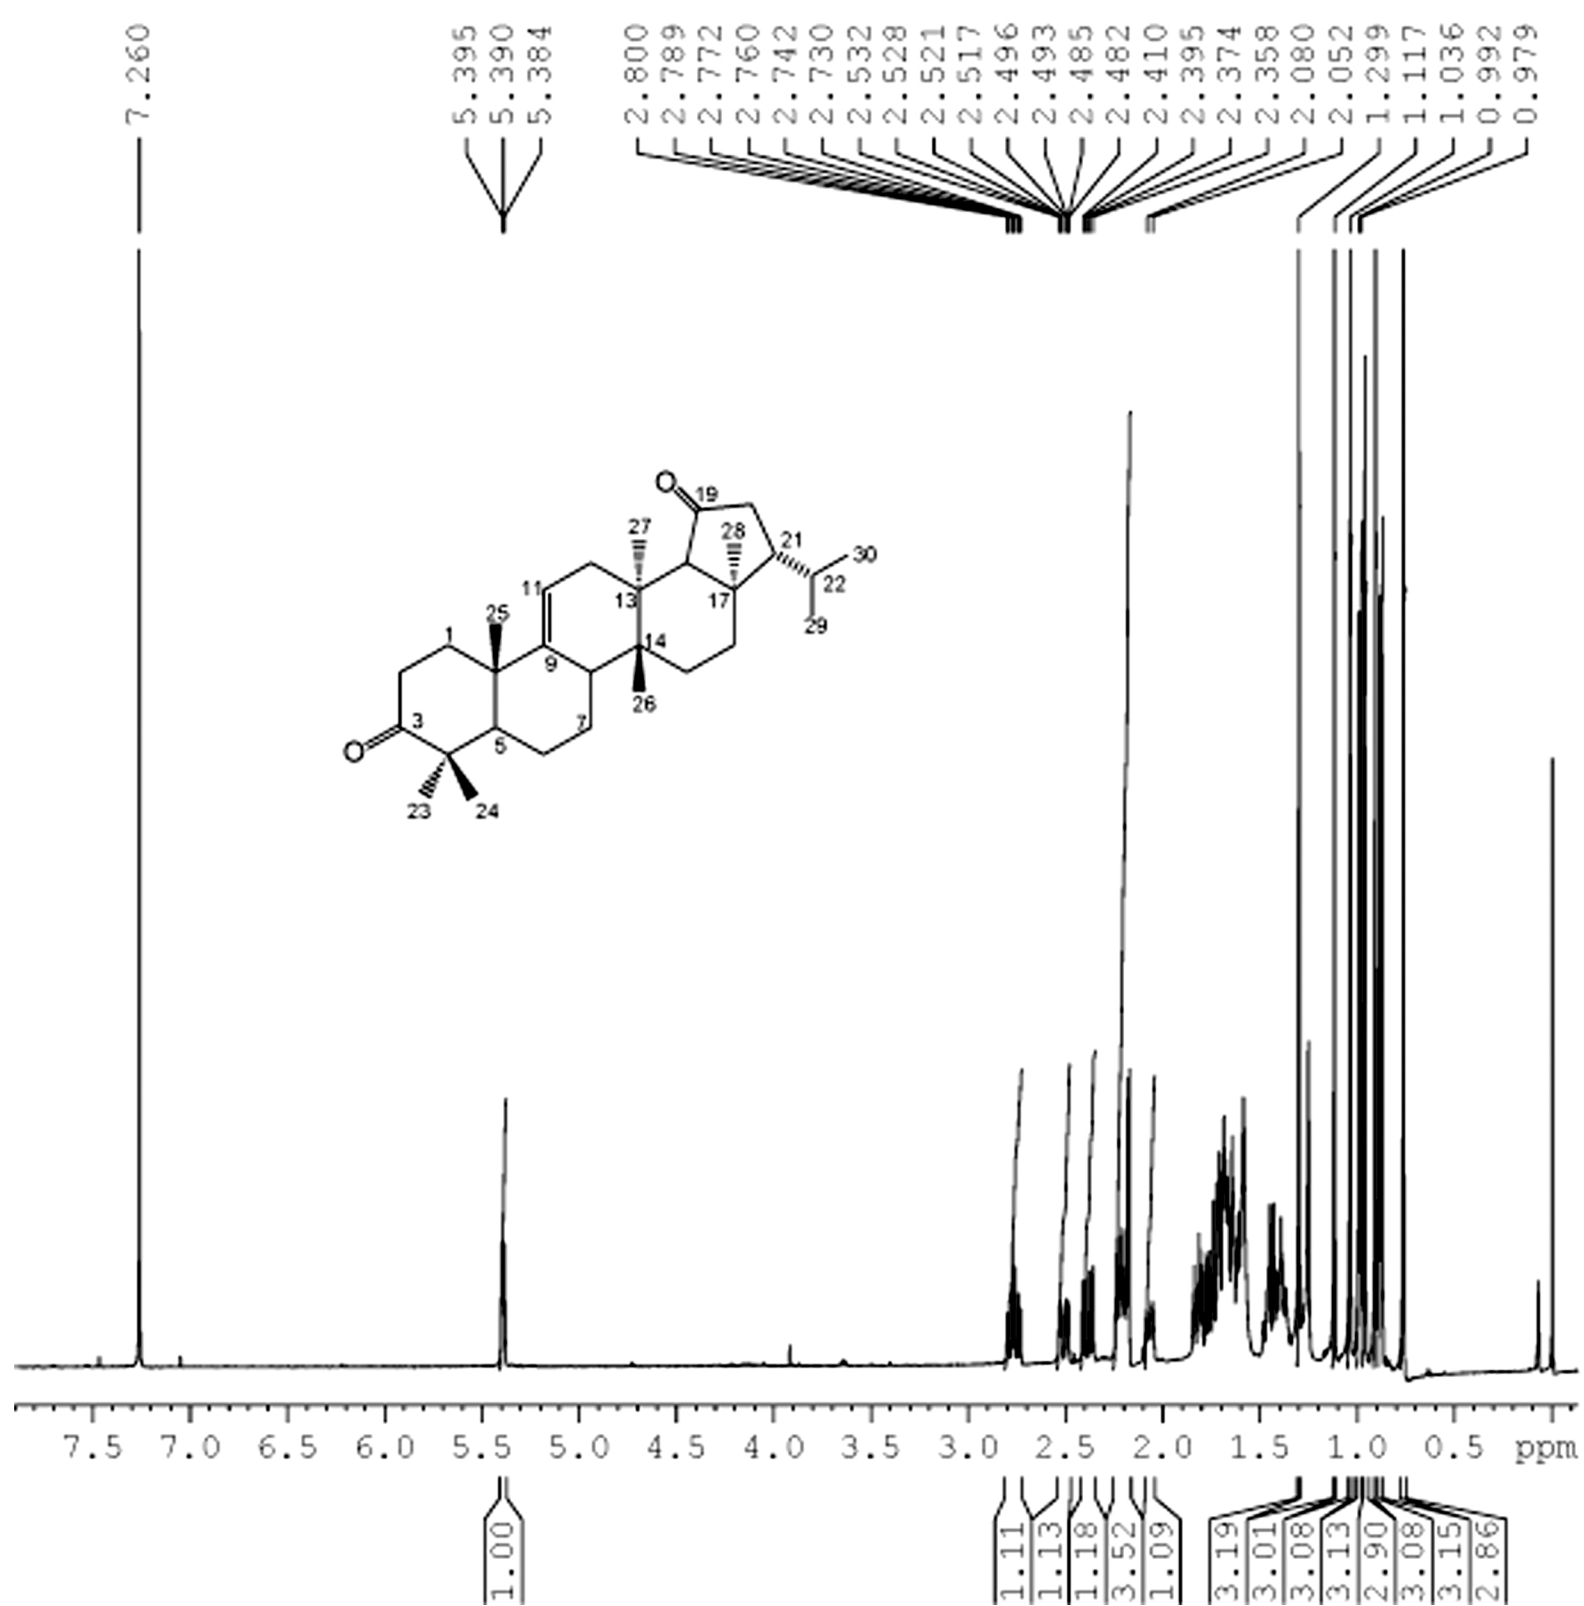

S1. <sup>1</sup>H NMR spectrum of the new compound 1 in CDCl<sub>3</sub>

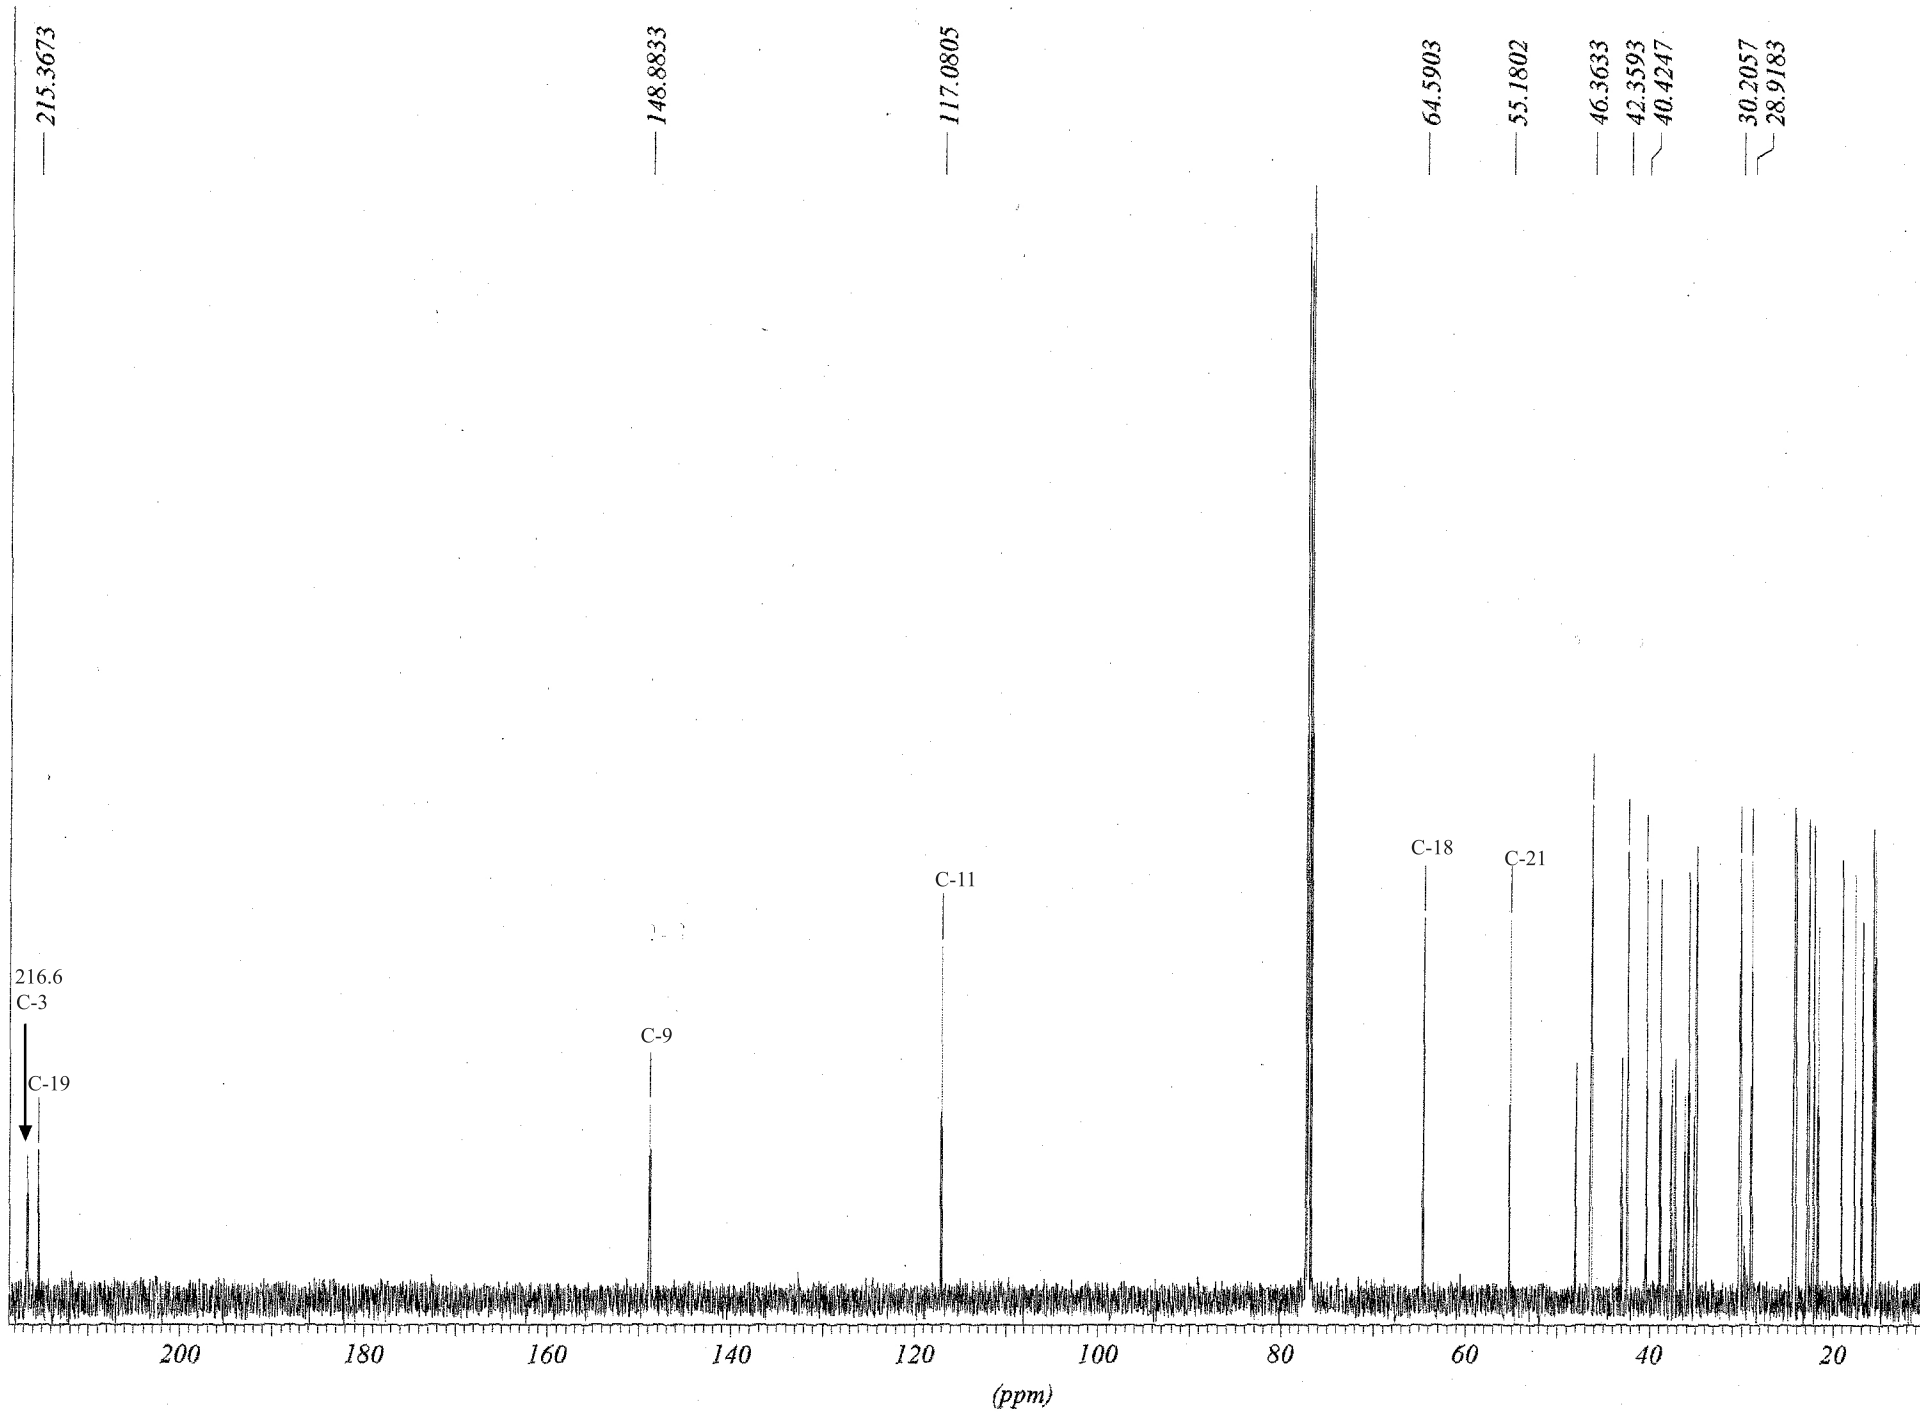

S2. <sup>13</sup>C NMR spectrum of the new compound 1 in CDCl<sub>3</sub>



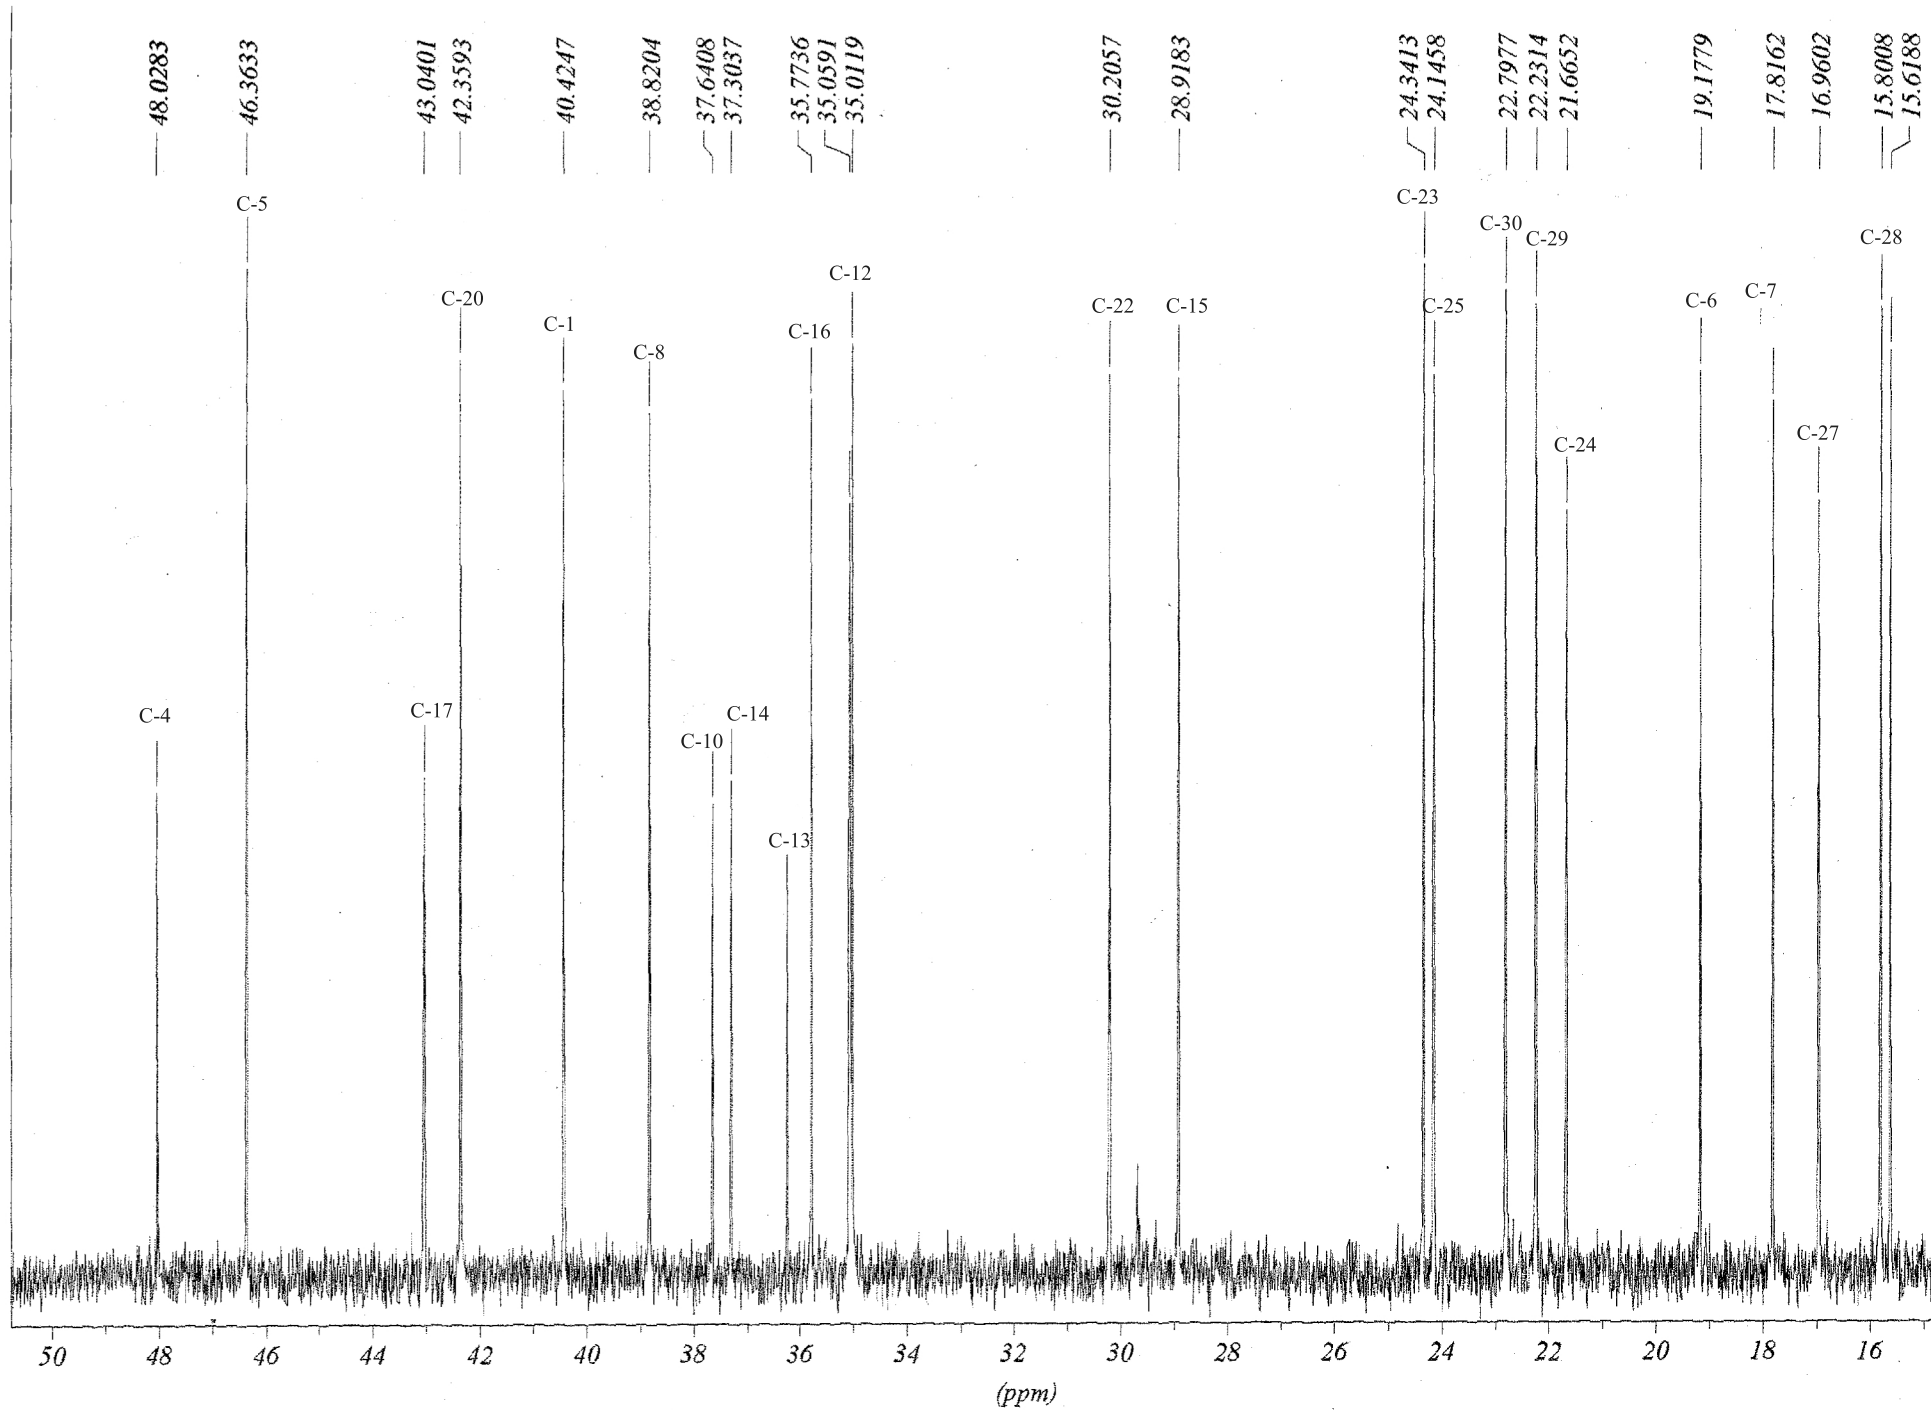

S3. <sup>13</sup>C NMR spectrum of the new compound 1 in CDCl<sub>3</sub> (partial view of the region 48.0 – 15.6)

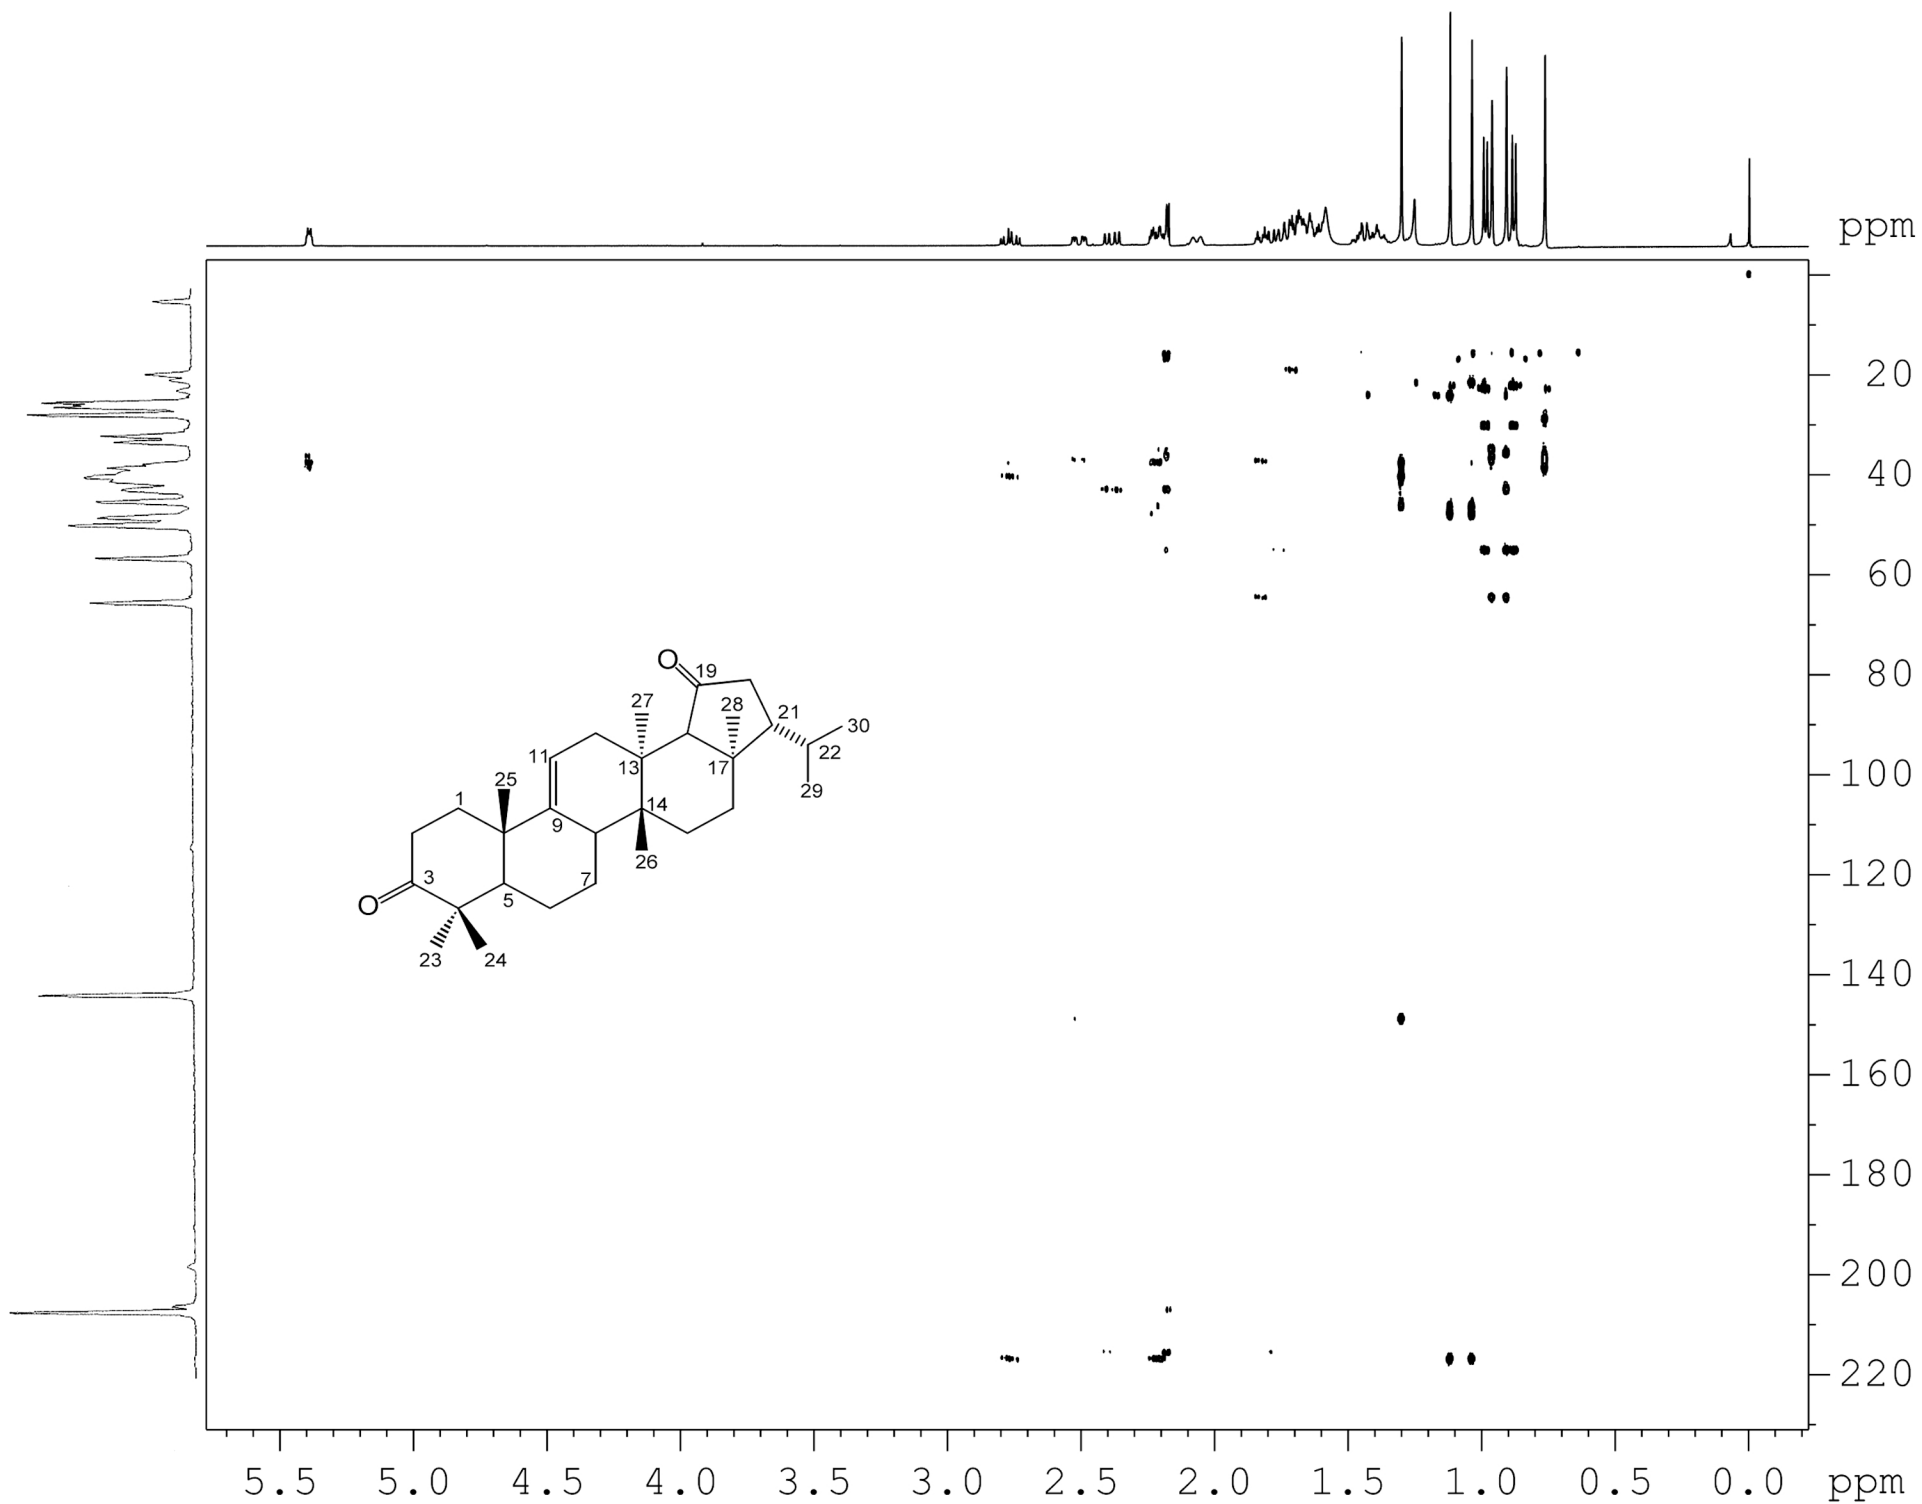

S4. HMBC spectrum of the new compound **1** in CDCl<sub>3</sub>

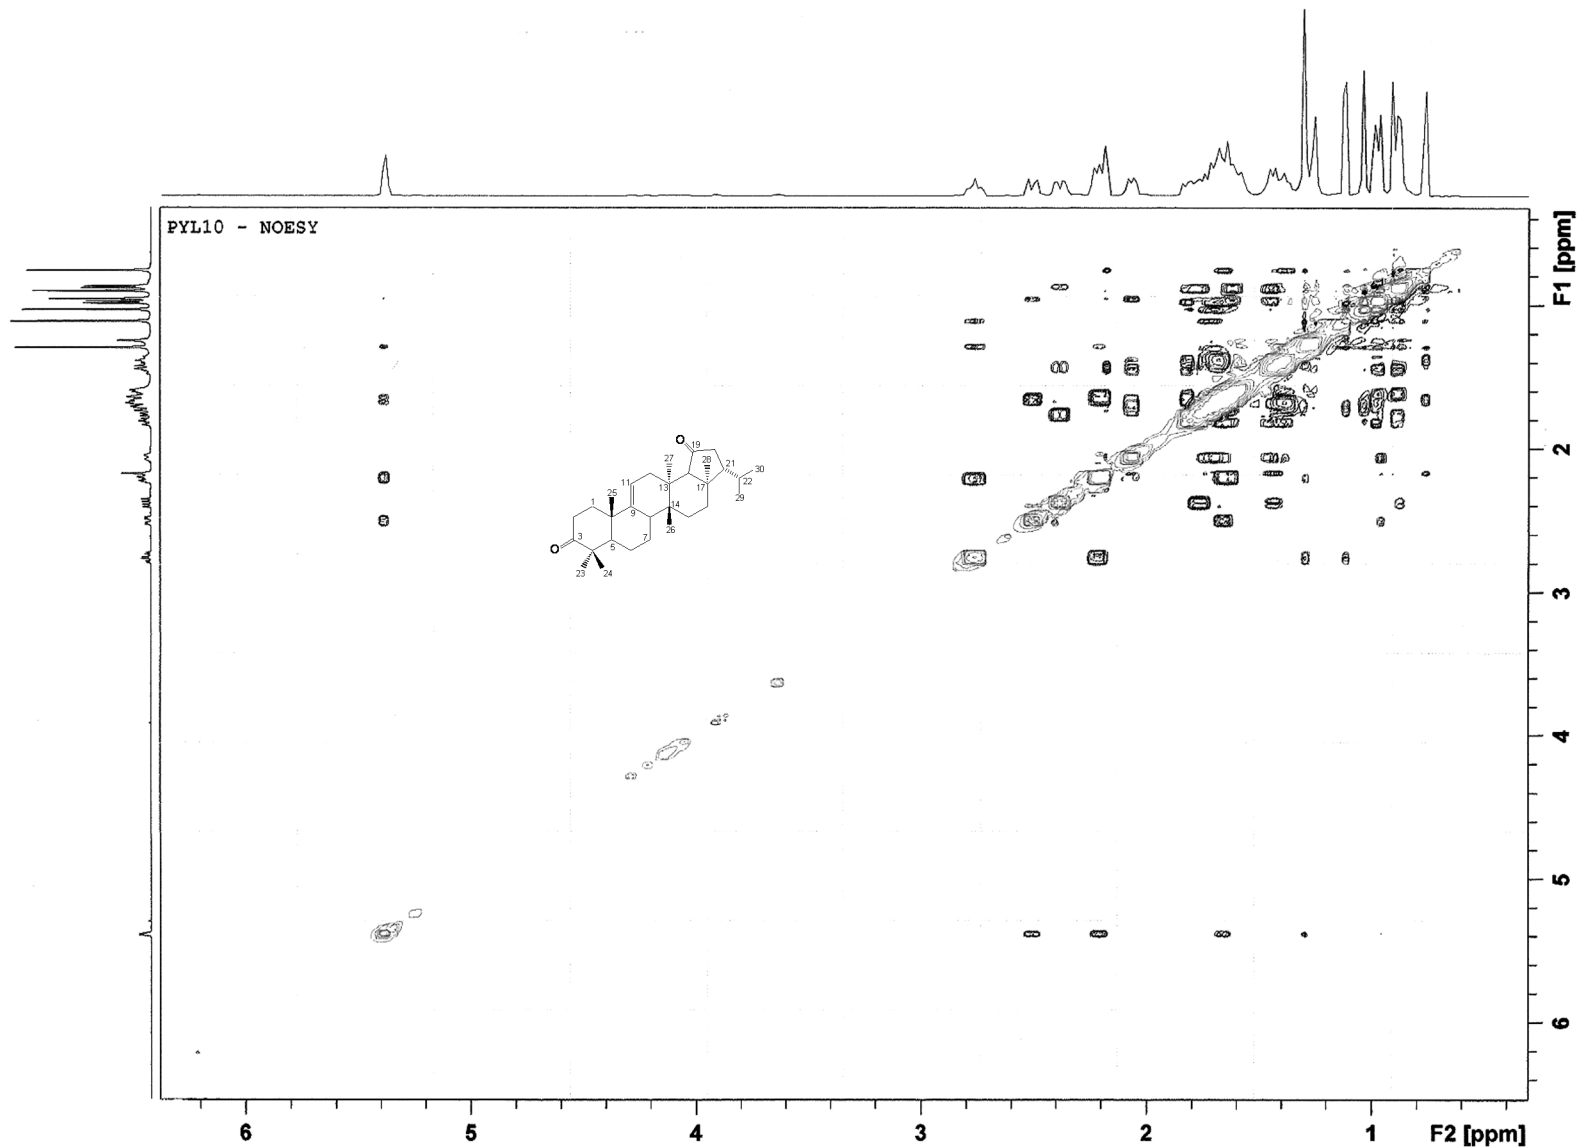

S5. NOESY spectrum of the new compound 1 in CDCl<sub>3</sub>

File:20144\_HR\_01 Ident:29\_34 SMO(2,5) BSUB(4096,512,-3.0) PKD(5,3,5,0.01%,2.0,0.00%,F,F) SPEC(Heights,Centroid) Acq: 8-FEB-2008 11:43:44  
ZAB-SET EI+ Voltage BpI:3152256 TIC:129712384 Flags:NORM  
File Text:PYL-10, HR EI, JBS, in CHCl3

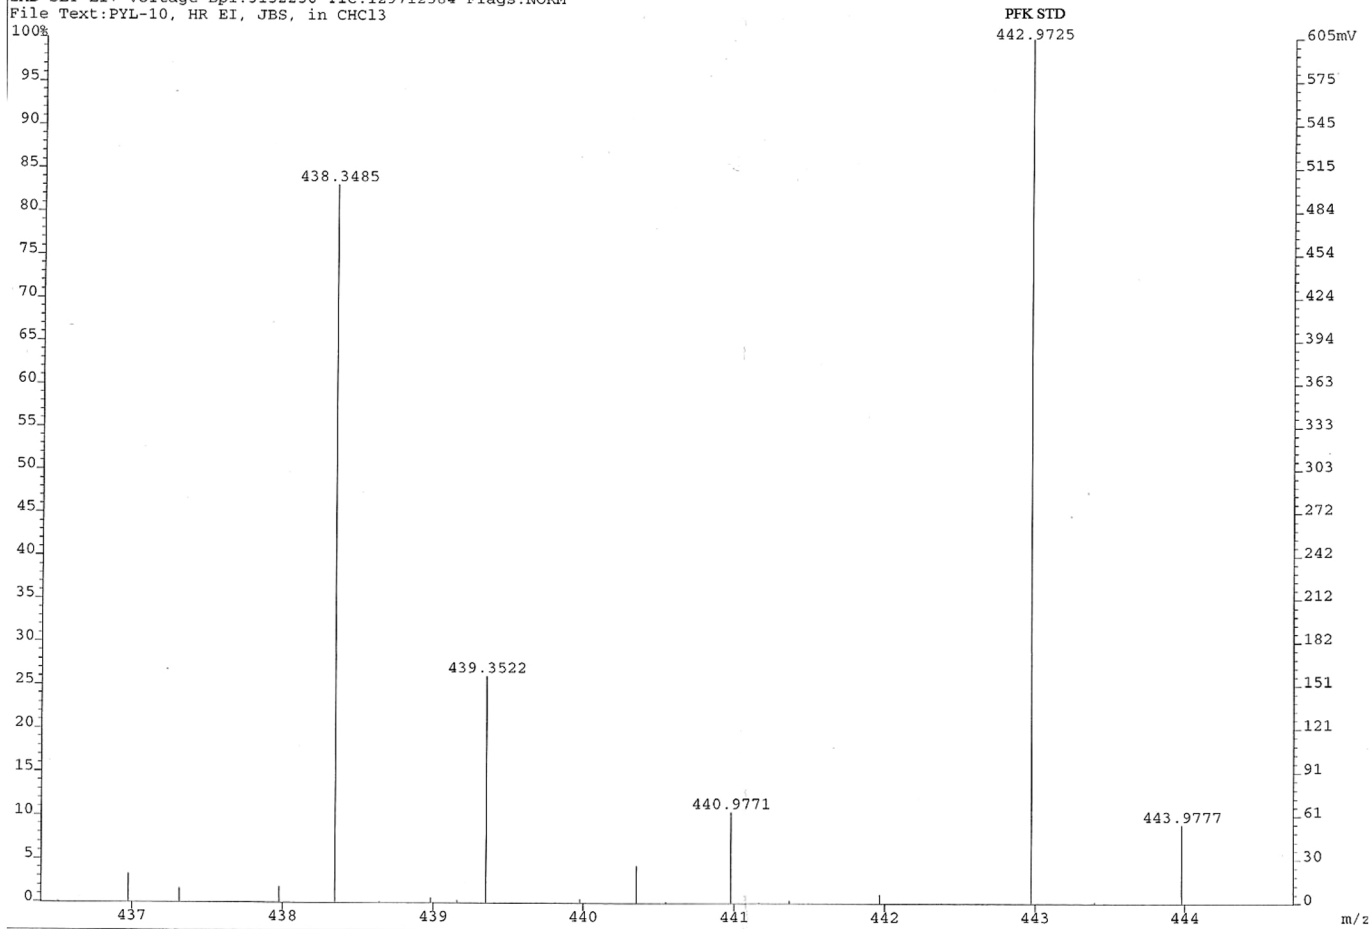

S6. HREIMS spectrum of the new compound 1

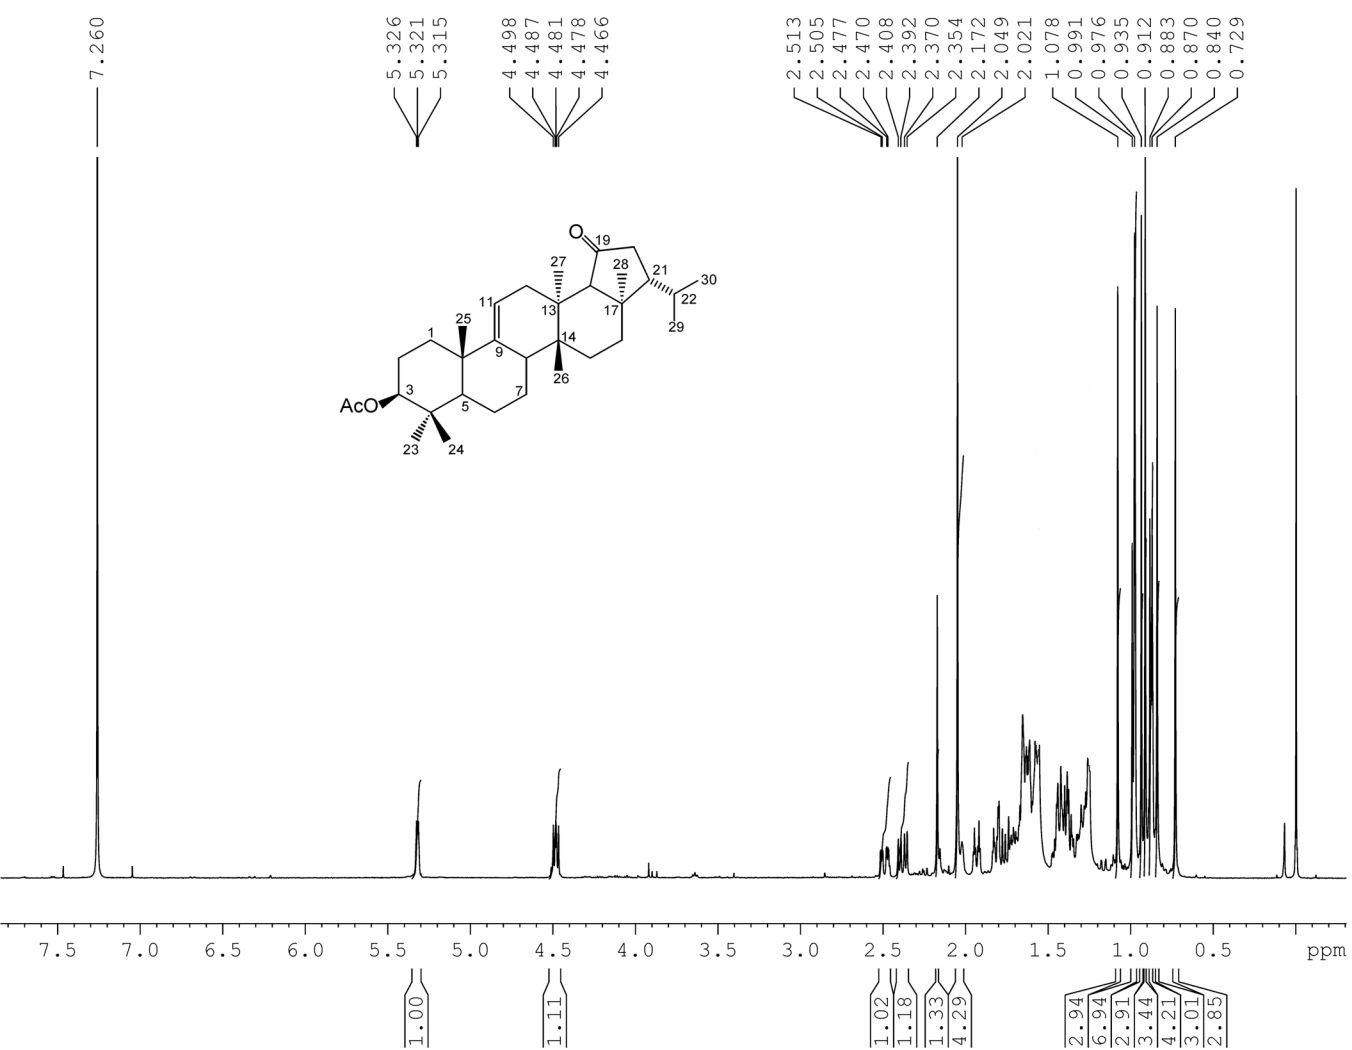

S7.  $^1\text{H}$  NMR spectrum of the new compound **2** in CDCl<sub>3</sub>

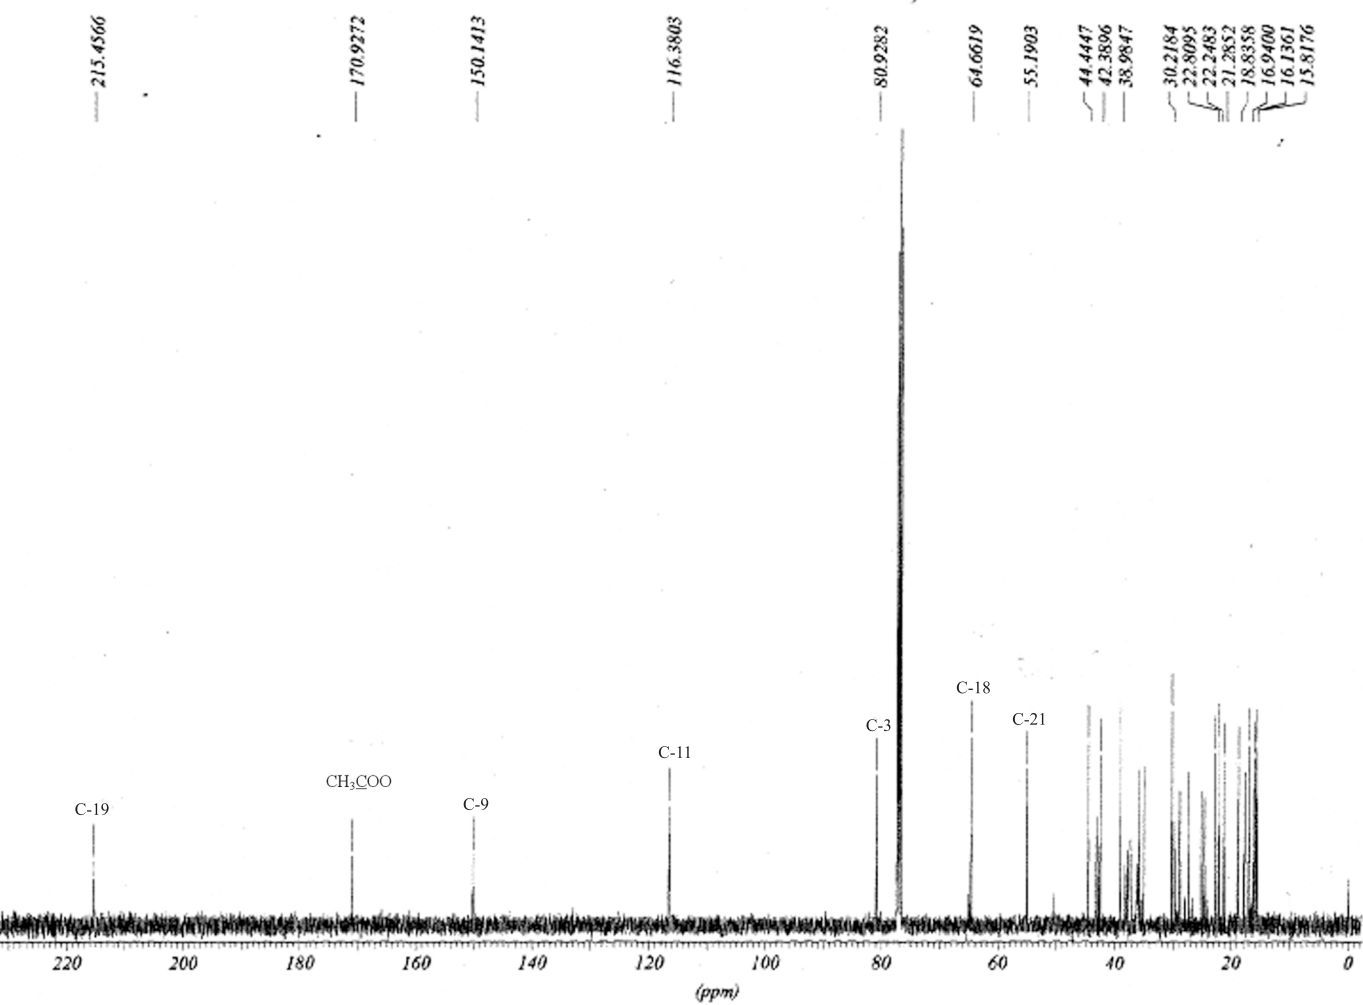

S8. <sup>13</sup>C NMR Spectrum of the new compound 2 in CDCl<sub>3</sub>

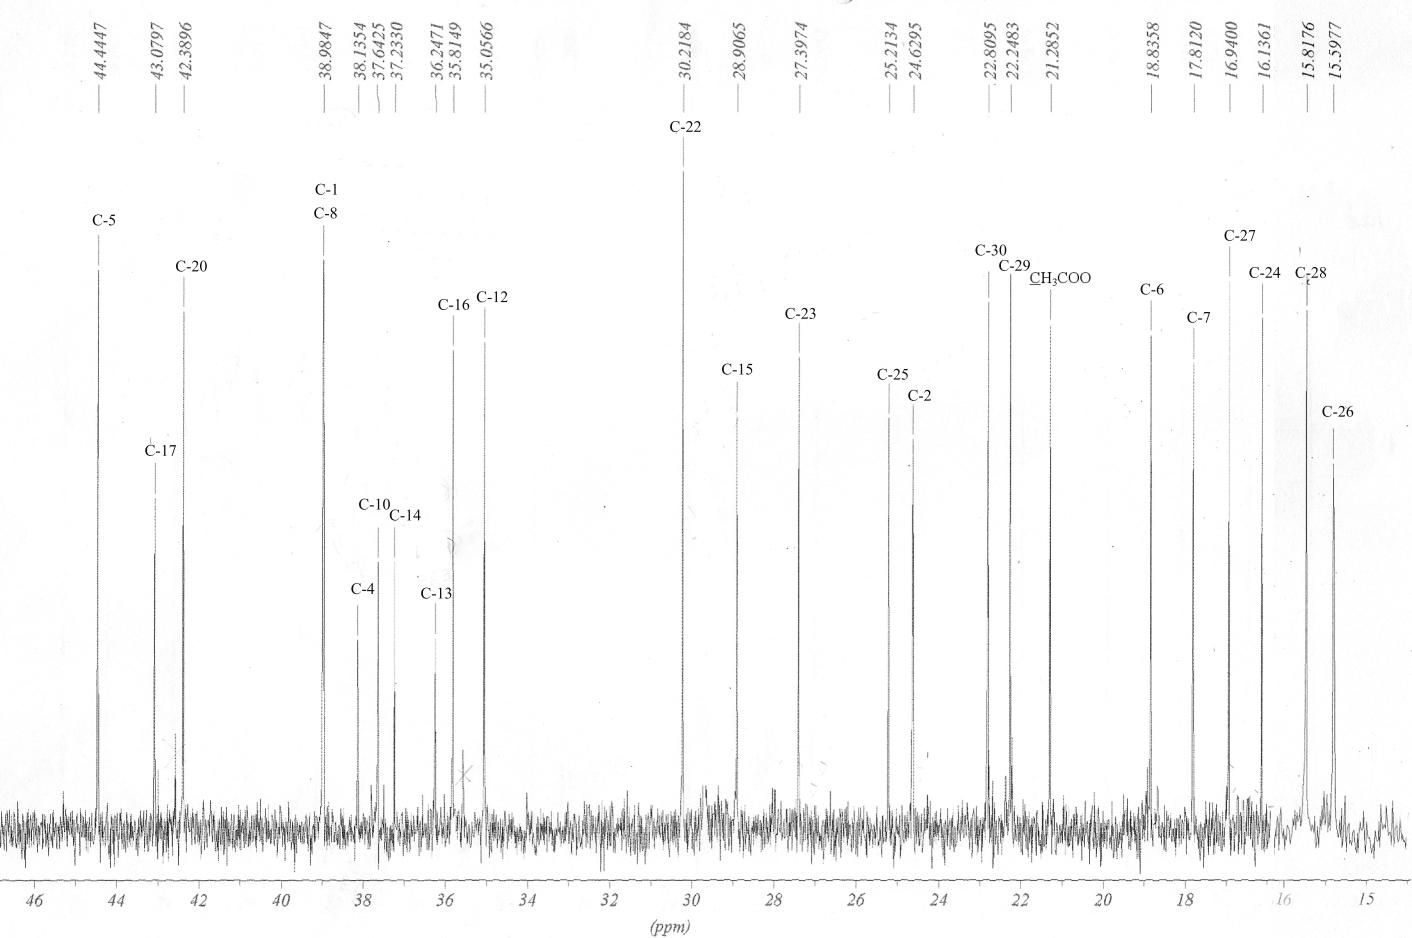

S9. <sup>13</sup>C NMR Spectrum of the new compound **2** in CDCl<sub>3</sub> (partial view of the region 44.4-15.6 ppm)

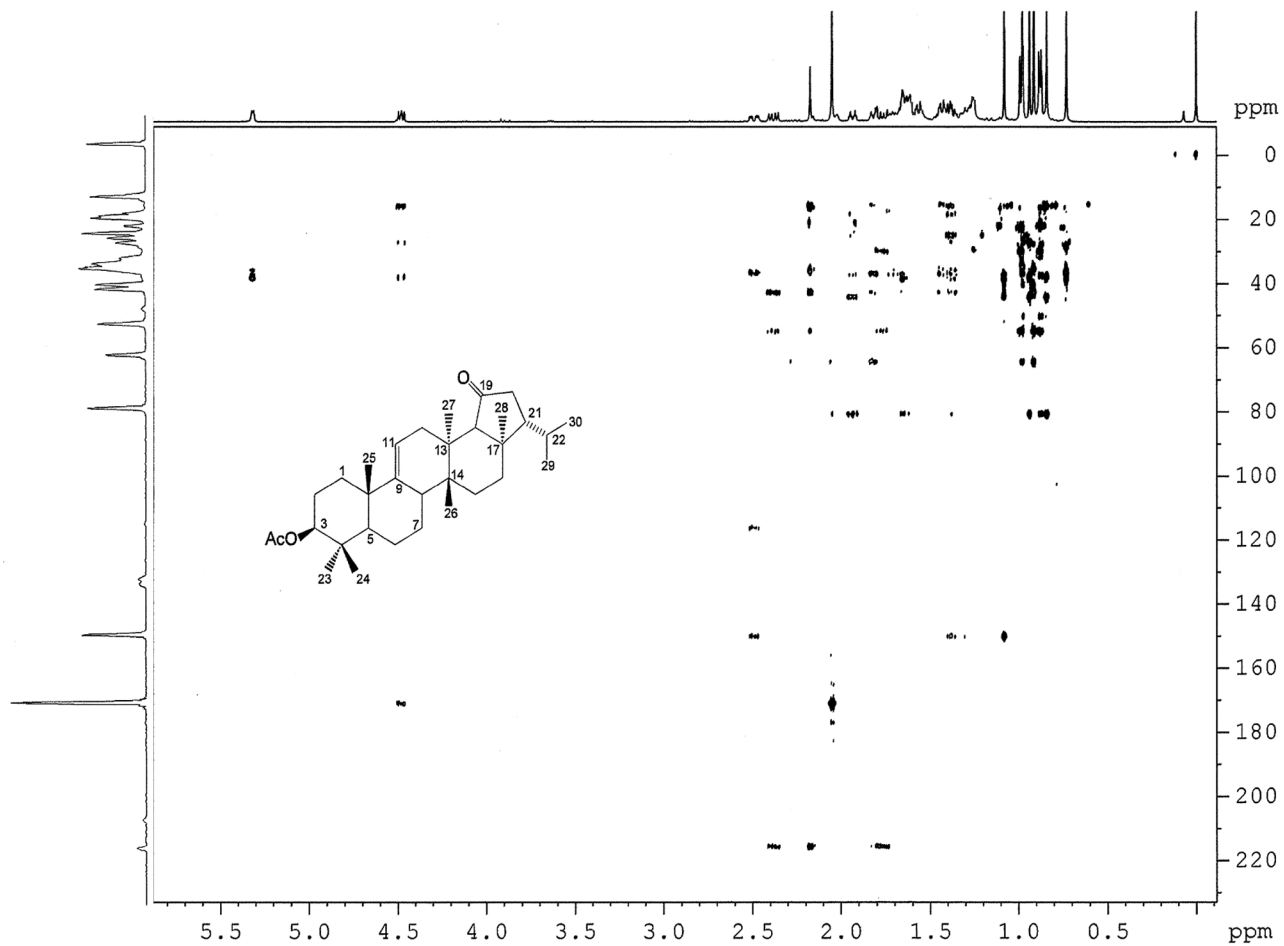

S10. HMBC spectrum of the new compound 2 in CDCl<sub>3</sub>



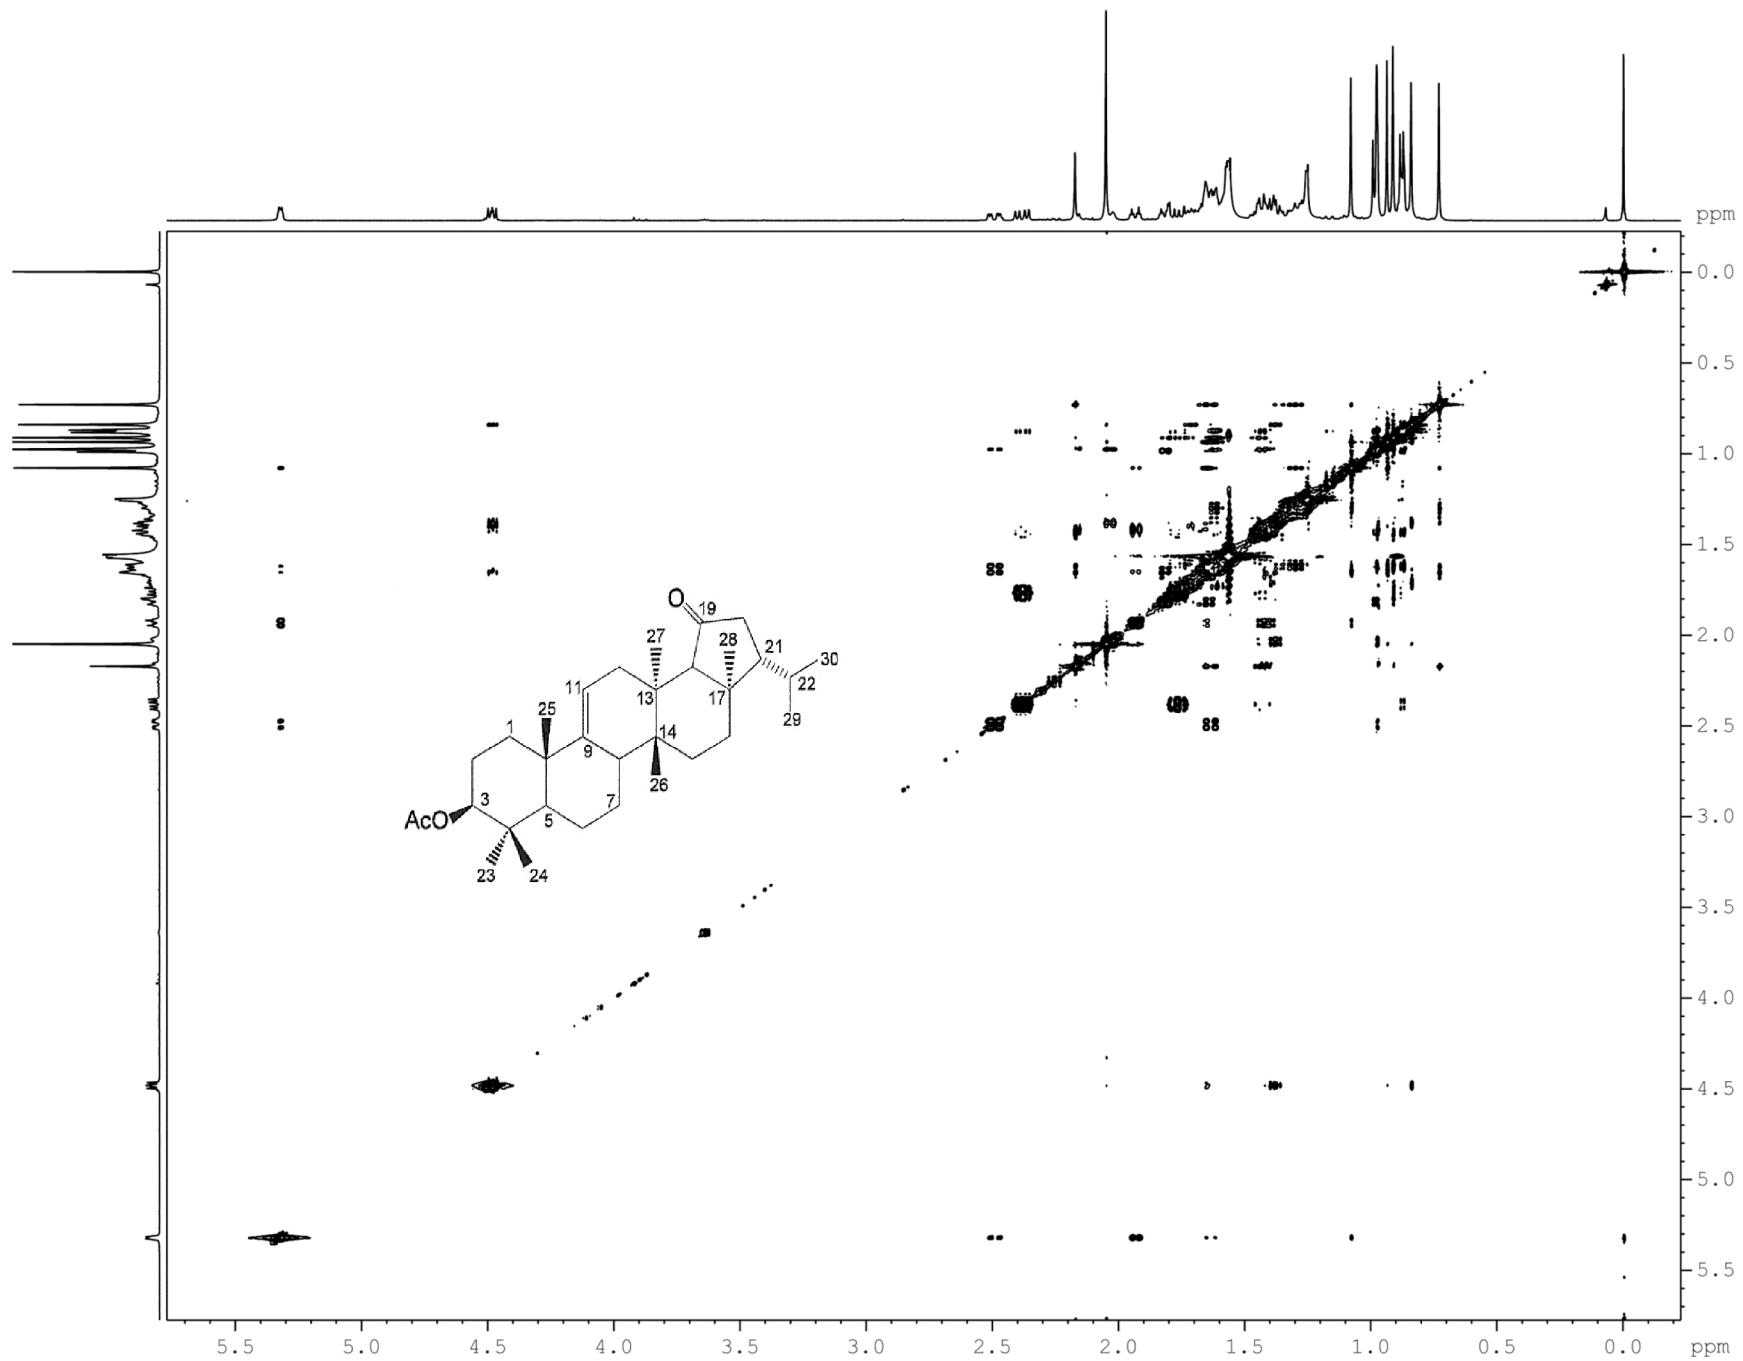

S11. NOESY spectrum of the new compound **2** in CDCl<sub>3</sub>

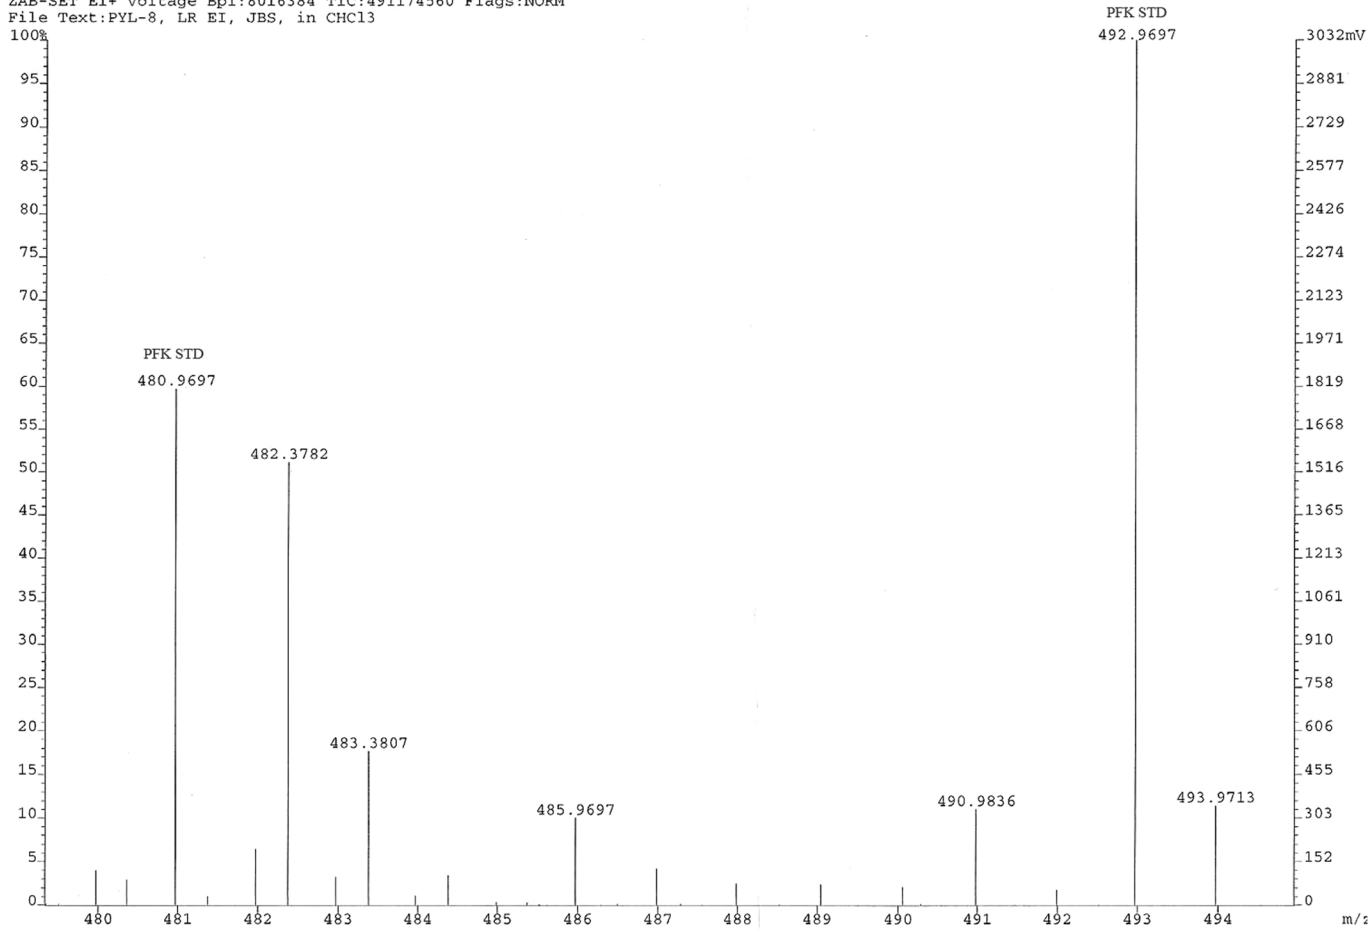

S12. HREIMS spectrum of the new compound 2
